# Supplementary material
Source: Research Square preprint supplement (doi:10.21203/rs.3.rs-9513588/v1)
Supplement: Supplementary file 1 [file 632c0393a94a69f543d906c3.docx]

Text S1

The analysis of the adsorption and oxidation of Mn(Ⅱ) by ss21 using an adapted version of the four-stage sequential extraction protocol detailed: (1) Residual fraction: a 5 mL culture sample was centrifuged at 10,000 rpm for 10 min; the supernatant was retained for the measurement of soluble Mn. (2) Extracellularly adsorbed fraction: the pellet was washed three times with deionized water, resuspended in 5 mL of 50 mM CuSO₄ solution, and shaken at 170 rpm and 25 °C for 8 h. The supernatant was then analyzed for Mn content. (3) Intracellularly adsorbed fraction: following extracellular extraction, the cells were thoroughly disrupted via ultrasonication (5 s work, 3 s interval, for a total of 12 cycles). The same volume of CuSO₄ was added again, and the mixture was shaken overnight. The Mn(Ⅱ) concentration in the supernatant was measured as the intracellularly adsorbed portion. (4) Total oxidized fraction: 5 mL of 20 mM hydroxylamine hydrochloride was added to the residue to reduce and solubilize Mn oxides. After centrifugation at 10,000 rpm for 10 min, the Mn concentration in the supernatant was determined and defined as the total oxidized Mn.

**
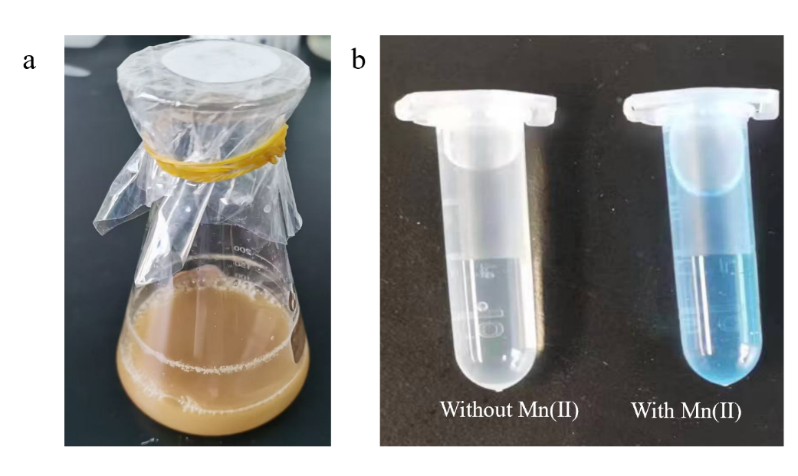
**

**Fig.S1**. Conical flask containing Mn(Ⅱ) and ss21 cultured for 5 d (a), LBB test of strain ss21 cultivated with 40 mg/L Mn(Ⅱ) (b).


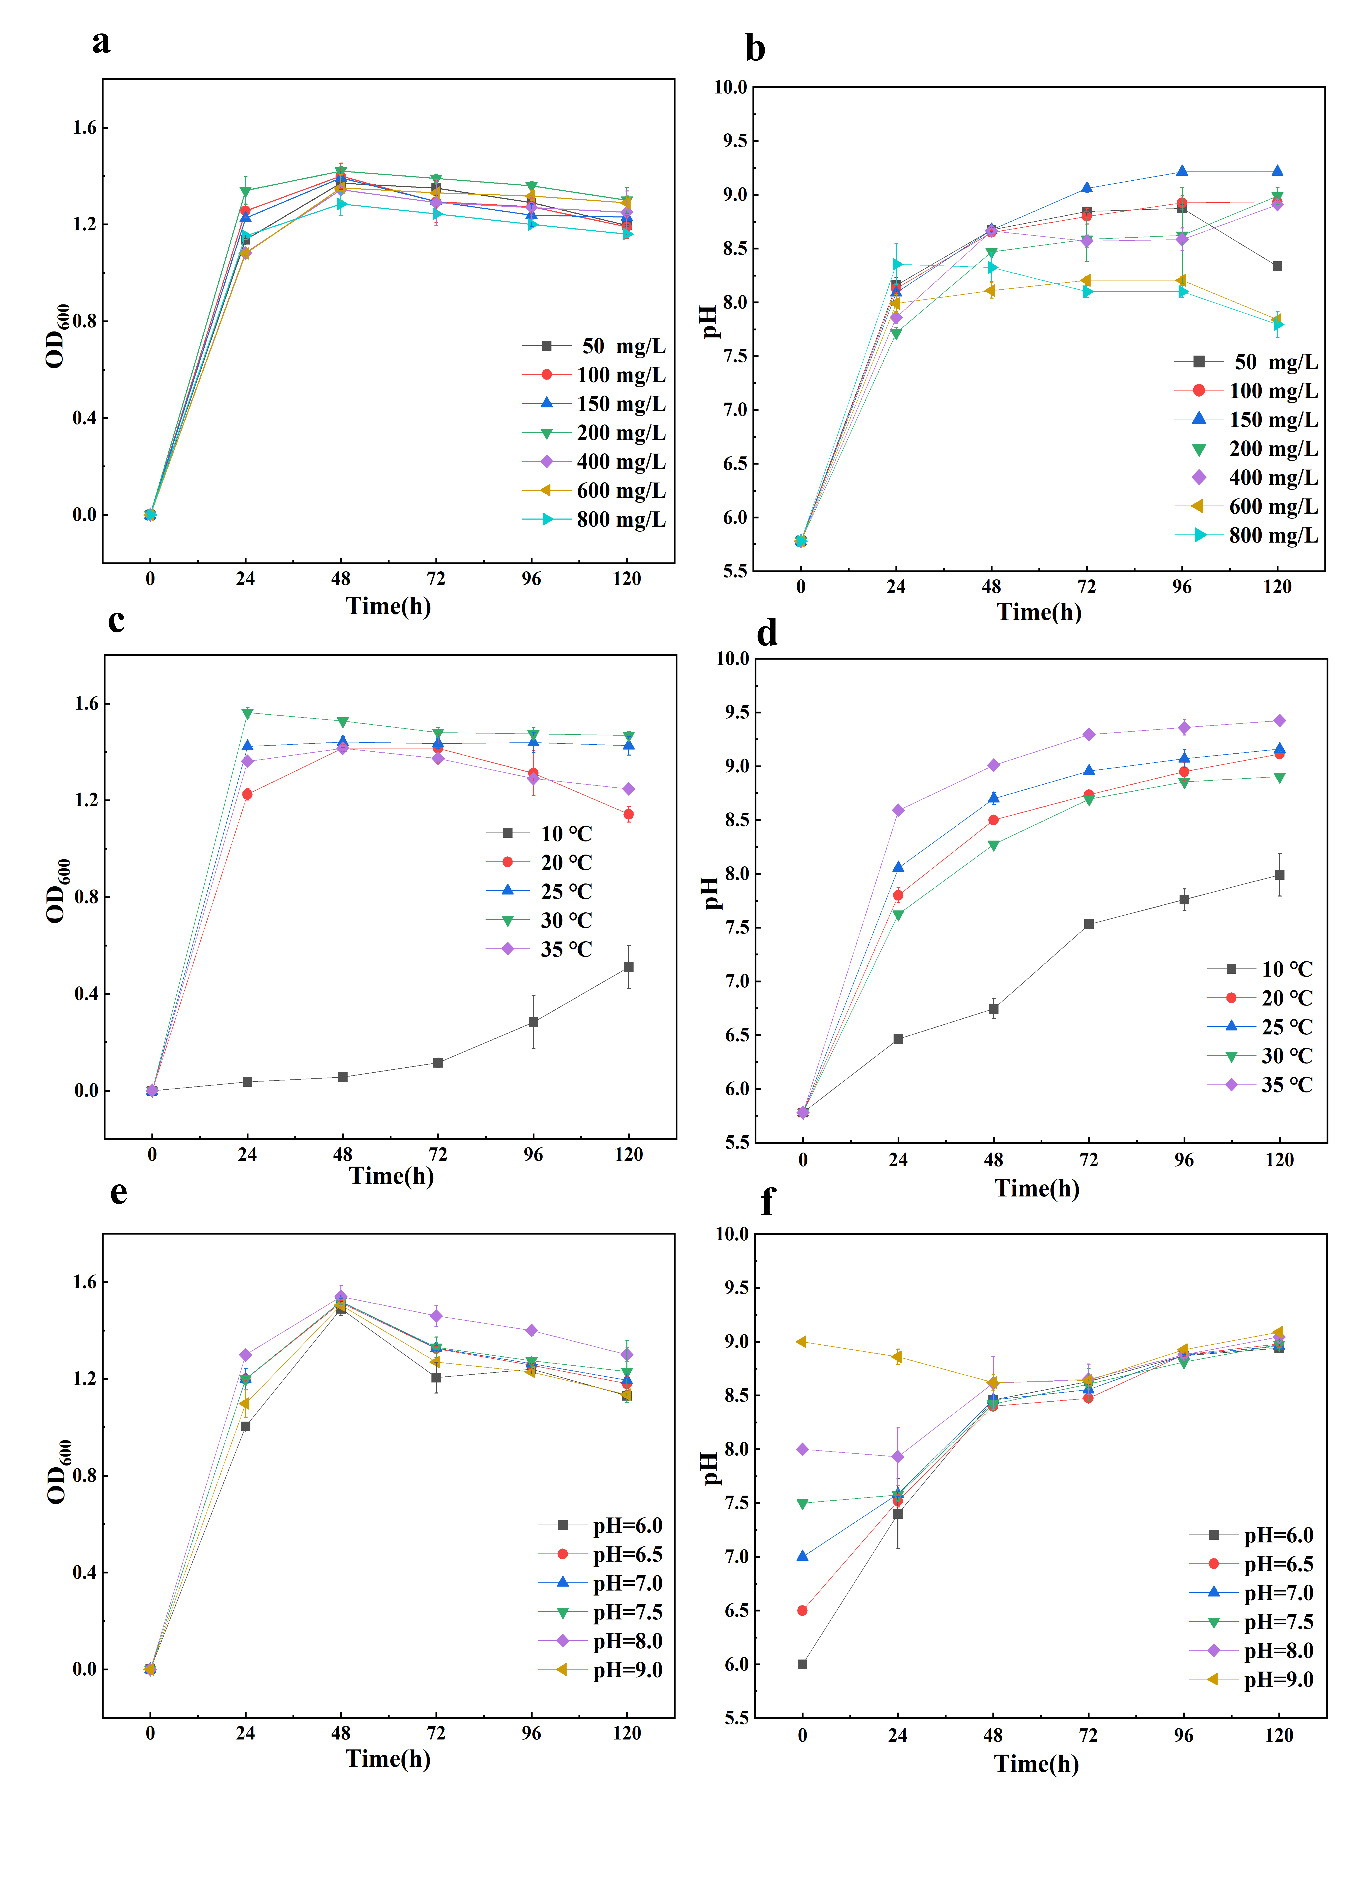


**Fig.S2**. OD600 and pH change under different initial Mn(Ⅱ) concentrations (a and b), different temperature (c and d), different initial pH (e and f).

**
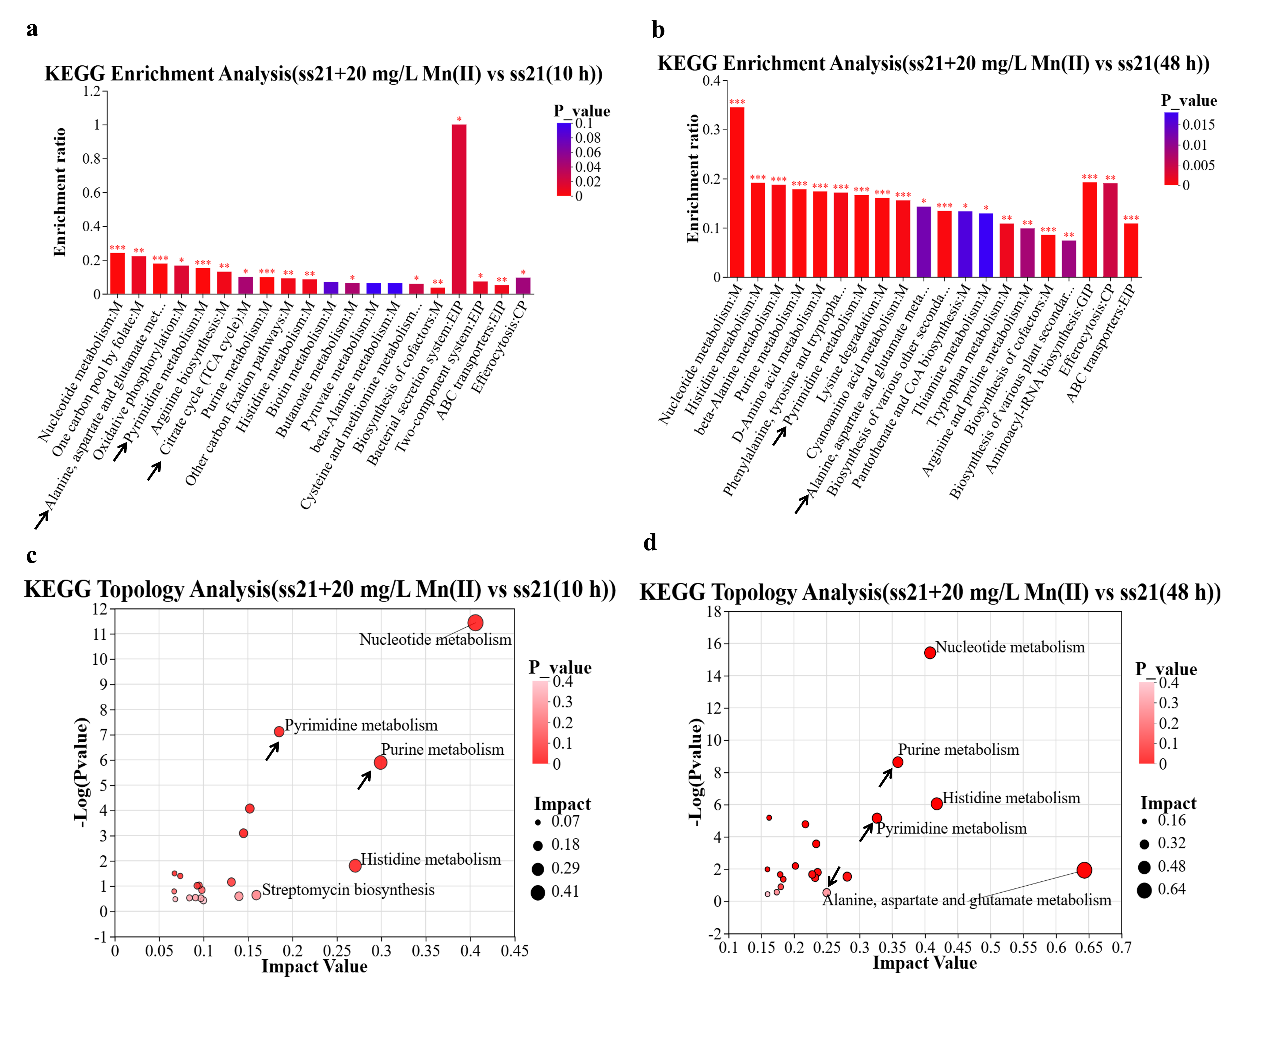
**

**Fig. S3.** Analysis of different metabolites and metabolic pathways in bacterial culture systems: KEGG enrichment analysis of (a) ss21 + 20 mg/L Mn(Ⅱ) vs ss21 (10 h),(b) ss21 + 20 mg/L Mn(Ⅱ) vs ss21(48 h); KEGG topology analysis of (c) ss21 + 20 mg/L Mn(Ⅱ) vs ss21 (10 h),(d) ss21 + 20 mg/L Mn(Ⅱ) vs ss21(48 h).


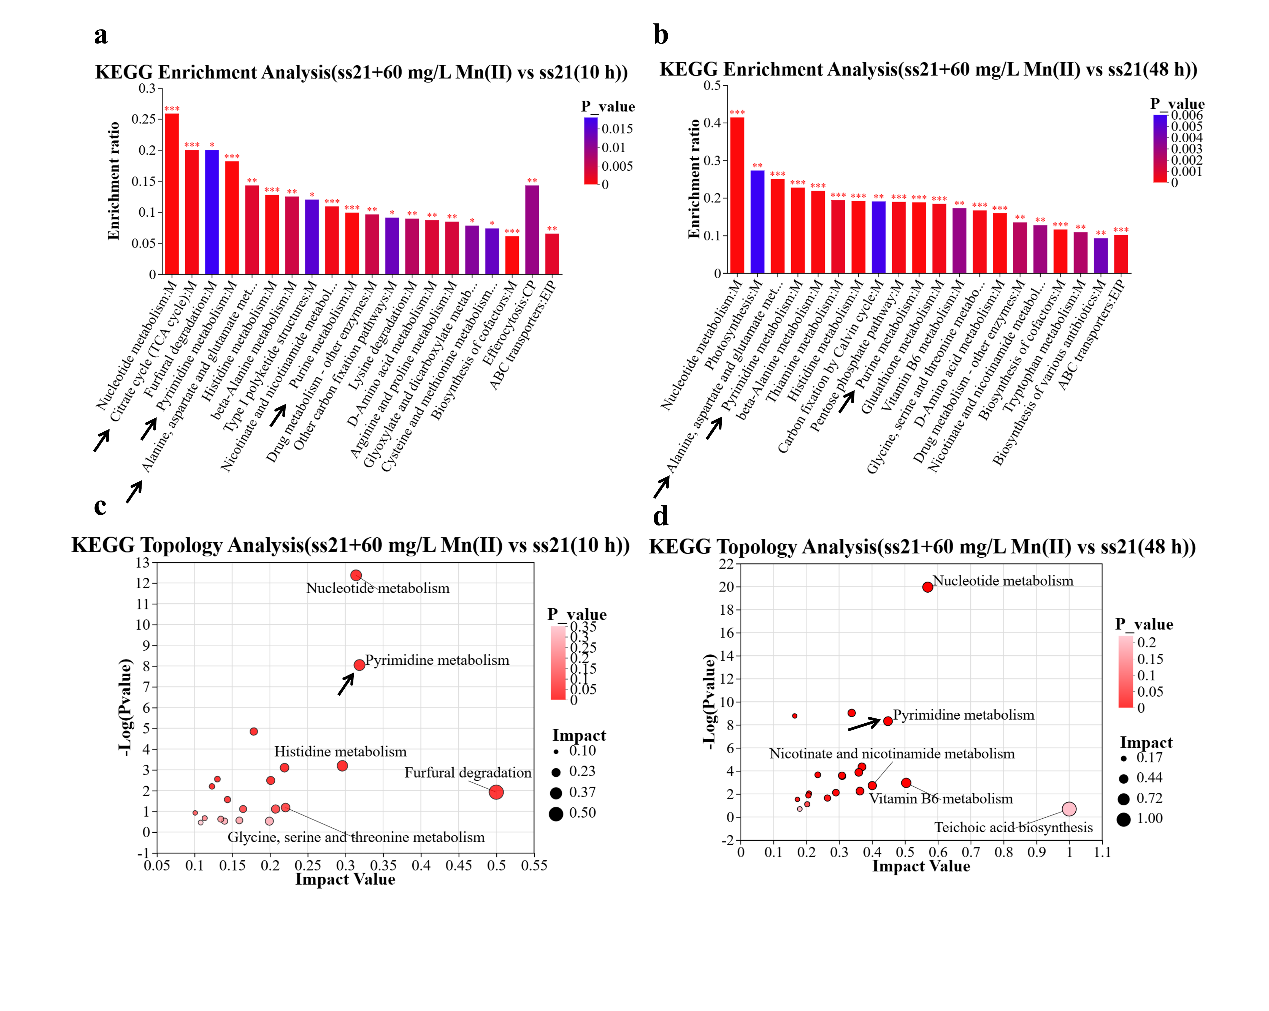


**Fig.S4.** Analysis of different metabolites and metabolic pathways in bacterial culture systems: KEGG enrichment analysis of (a) ss21 + 60 mg/L Mn(Ⅱ) vs ss21 (10 h), (b) ss21 + 60 mg/L Mn(Ⅱ) vs ss21(48 h); KEGG topology analysis of (c) ss21 + 60 mg/L Mn(Ⅱ) vs ss21 (10 h), (d) ss21 + 60 mg/L Mn(Ⅱ) vs ss21(48 h).

**Table S1**

GO enrichment pathway related to the Mn(Ⅱ) oxidation process was increased in 48 h (ss21+20 mg/L Mn(Ⅱ)).

| GO ID | Function Description | gene id | gene name | gene description |
| --- | --- | --- | --- | --- |
| GO:0001539 | cilium or flagellum-dependent cell motility | *HV701_RS25670* | *flgG* | flagellar basal-body rod protein FlgG |
| *HV701_RS25690* | *flgC* | flagellar basal body rod protein FlgC |
| *HV701_RS25695* | *flgB* | flagellar basal body rod protein FlgB |
| *HV701_RS26070* | *fliS* | flagellar export chaperone FliS |
| *HV701_RS26180* | *fliE* | flagellar hook-basal body complex protein FliE |
| *HV701_RS26190* | *fliG* | flagellar motor switch protein FliG |
| GO:0048870 | cell motility | *HV701_RS25670* | *flgG* | flagellar basal-body rod protein FlgG |
| *HV701_RS25690* | *flgC* | flagellar basal body rod protein FlgC |
| *HV701_RS25695* | *flgB* | flagellar basal body rod protein FlgB |
| *HV701_RS26070* | *fliS* | flagellar export chaperone FliS |
| *HV701_RS26180* | *fliE* | flagellar hook-basal body complex protein FliE |
| *HV701_RS26190* | *fliG* | flagellar motor switch protein FliG |
| GO:0016226 | iron-sulfur cluster assembly | *HV701_RS02490* | *iscX* | Fe-S cluster assembly protein IscX |
| *HV701_RS02500* | *hscA* | Fe-S protein assembly chaperone HscA |
| *HV701_RS02510* | *iscA* | iron-sulfur cluster assembly protein IscA |
| *HV701_RS02515* | *iscU* | Fe-S cluster assembly scaffold IscU |
| GO:0003677 | DNA binding | *HV701_RS02525* | *iscR* | Fe-S cluster assembly transcriptional regulator IscR |
| *HV701_RS19430* | *cueR* | Cu(I)-responsive transcriptional regulator |

**Table S2**

GO enrichment pathway related to the Mn(Ⅱ) oxidation process was increased in 48 h (ss21+60 mg/L Mn(Ⅱ)).

| GO ID | Function Description | gene id | gene name | gene description |
| --- | --- | --- | --- | --- |
| GO:0003700 | DNA-binding transcription factor activity | *HV701_RS19430* | *cueR* | Cu(I)-responsive transcriptional regulator |
| *HV701_RS02525* | *iscR* | Fe-S cluster assembly transcriptional regulator IscR |
| GO:0140110 | transcription regulator activity | *HV701_RS03300* | *HV701_RS03300* | MerR family transcriptional regulator |
| *HV701_RS17390* | *HV701_RS17390* | MerR family transcriptional regulator |
| *HV701_RS10460* | *HV701_RS10460* | LysR family transcriptional regulator |
| *HV701_RS18625* | *HV701_RS18625* | LysR family transcriptional regulator |
| *HV701_RS06395* | *HV701_RS06395* | LysR family transcriptional regulator |

**Table S3**

GO enrichment pathway related to the Mn(Ⅱ) oxidation process was increased in 48 h (ss21+200 mg/L Mn(Ⅱ)).

| GO ID | Function Description | gene id | gene name | gene description |
| --- | --- | --- | --- | --- |
| GO:0048870 | cell motility | *HV701_RS19230* | *motA* | flagellar motor stator protein MotA |
| *HV701_RS25670* | *flgG* | flagellar basal-body rod protein FlgG |
| *HV701_RS26190* | *fliG* | flagellar motor switch protein FliG |
| *HV701_RS26195* | *fliH* | flagellar assembly protein FliH |
| *HV701_RS26200* | *flⅡ* | flagellar protein export ATPase FlⅡ |
| *HV701_RS26205* | *fliJ* | flagellar export protein FliJ |
| GO:0005575 | cellular_component | *HV701_RS19365* | *HV701_RS19365* | LLM class flavin-dependent oxidoreductase |
| *HV701_RS24690* | *HV701_RS24690* | quinone oxidoreductase family protein |
| *HV701_RS19360* | *HV701_RS19360* | thioredoxin family protein |
| *HV701_RS19445* | *HV701_RS19445* | glutathione peroxidase |
|  |  | *HV701_RS04390* | *HV701_RS04390* | copper resistance system multicopper oxidase |
